# Supplementary material
Source: PubMed Central journal article supplement (PMC2635040)

## Supplemental Figure

### Biophysical Characterization of the Engineered T20 Binding Protein 5H-ex.

- (A) SDS-PAGE analysis of purified 5-Helix (MW 25.4 kD) and 5H-ex (MW 31.6 kD). Approximately 2  $\mu\text{g}$  protein was loaded per lane, and bands were visualized by staining with Gelcode Blue (Pierce). Molecular weights of the standards (GE) run in the lane labeled “Marker” are shown to the right.
- (B) Analytical size exclusion chromatography of 5-Helix (black) and 5H-ex (red). Samples (100  $\mu\text{l}$  of 5  $\mu\text{M}$  protein) were loaded onto a Superdex 75HR 10/300 column (GE) running tris-buffered saline (TBS—50 mM tris pH 8, 100 mM NaCl) at 4°C. The triangles below the chromatograms represent the elution volumes of molecular weight standards (BioRad and GE) run under the same conditions.  $V_0$  indicates the column void volume.
- (C) Circular dichroism (CD) spectra of 5-Helix (black) and 5H-ex (red). Spectra were obtained from protein solutions (0.9  $\mu\text{M}$  protein in TBS at 4°C) in a 1 mm quartz cuvette using a Jasco J-810 spectropolarimeter. The larger absolute ellipticity ( $\theta$ ) at 222 and 208 nm for 5H-ex is consistent with the greater number of helical residues for this enlarged protein.
- (D) The CD spectra in C converted to mean residue ellipticity ( $[\theta]$ ). The depth of the well at 222 nm indicates that the 5H-ex protein adopts ~95% of the helical content expected from the design.
- (E) Thermal stability of 5-Helix (black) and 5H-ex (red) monitored by mean residue ellipticity at 222 nm. The experiments were performed using a protein concentration of 0.9  $\mu\text{M}$  in a stirred 1-cm quartz cuvette. All CD experiments were performed in triplicate with quantitatively similar results.

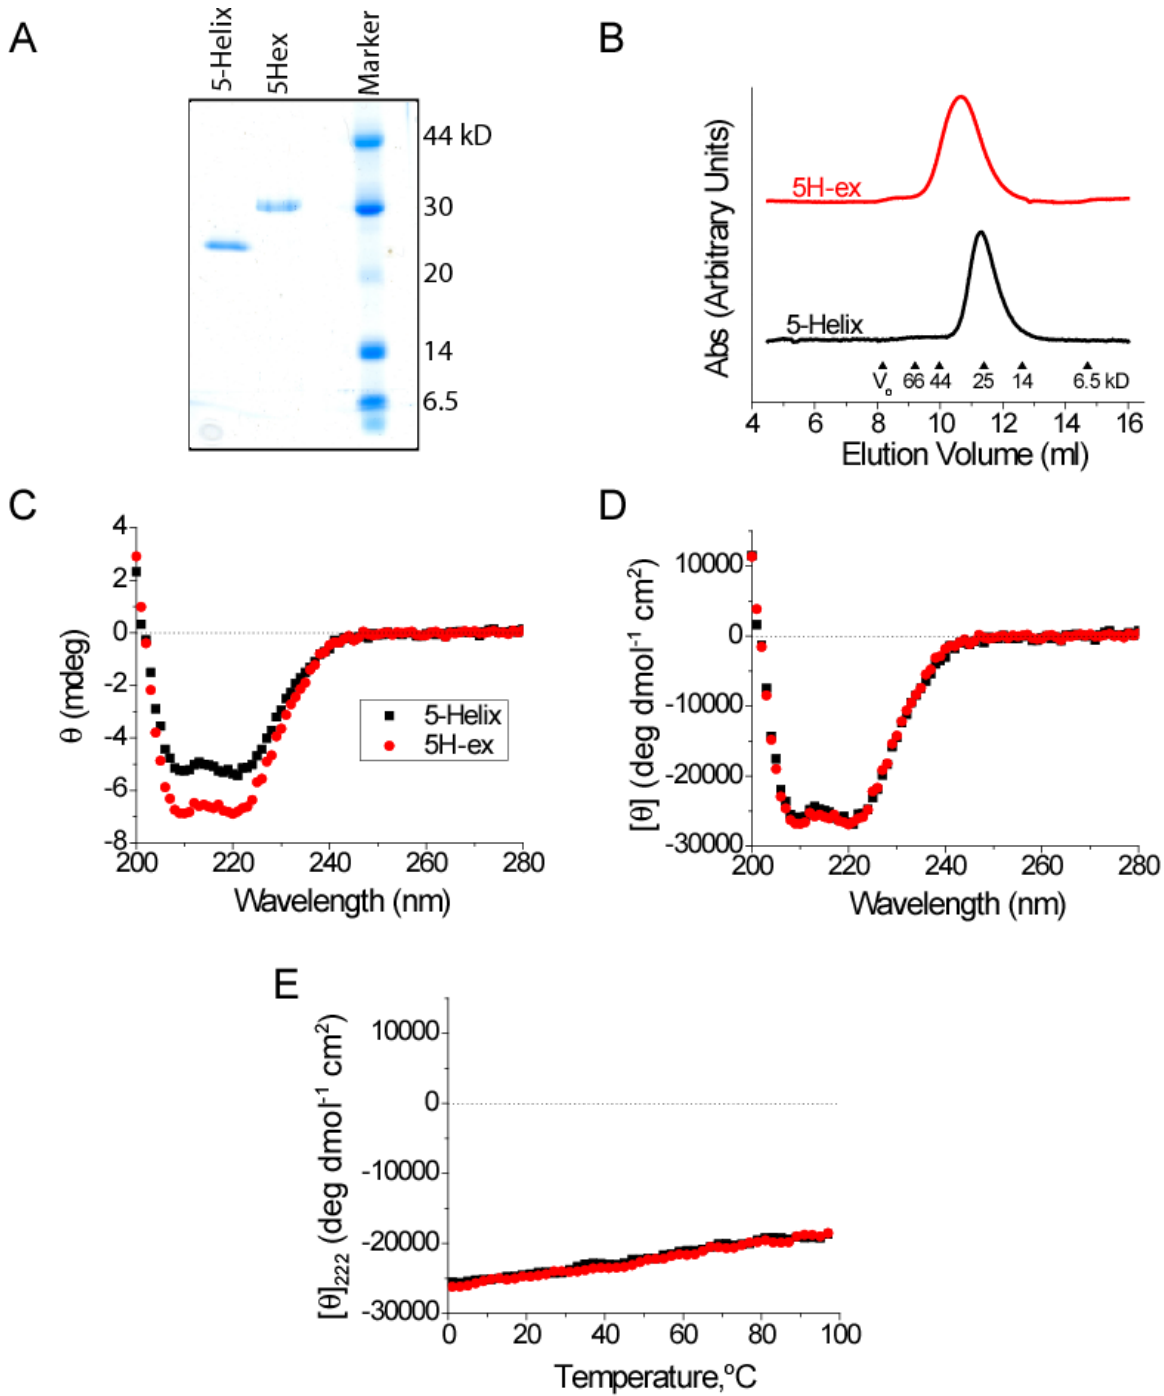

Supplement: M809269200_1.pdf [file M809269200_1.pdf]
